# Supplementary material
Source: PubMed Central journal article supplement (PMC6960449)
Supplement: EMBJ-39-e100789-s001.pdf [file EMBJ-39-e100789-s001.pdf]

## **APPENDIX**

### **Table of contents**

Appendix Figures S1-S4 and Appendix Figure legends  
Appendix Tables S1-S2 and Appendix Table legends

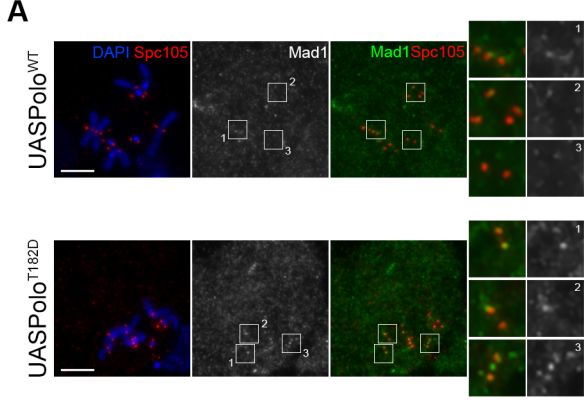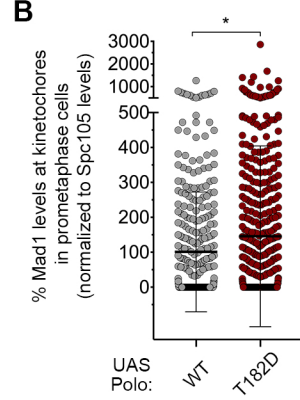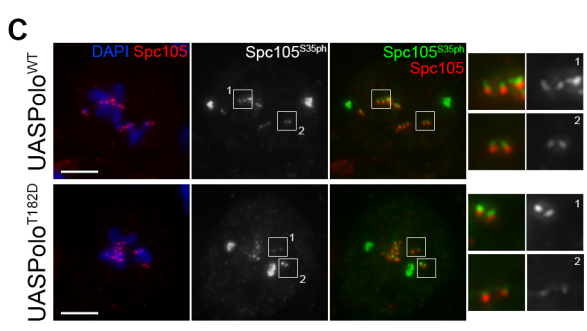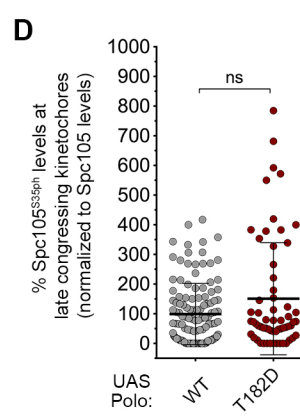

APPENDIX FIGURE S1

**A**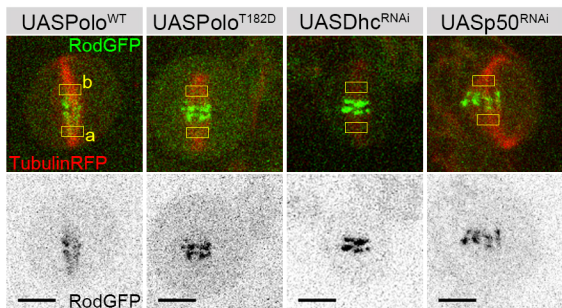**B**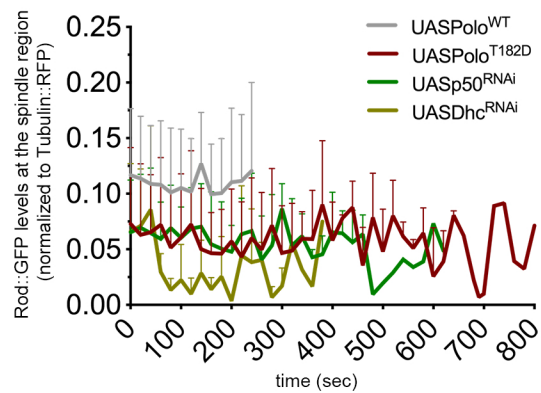

## APPENDIX FIGURE S2

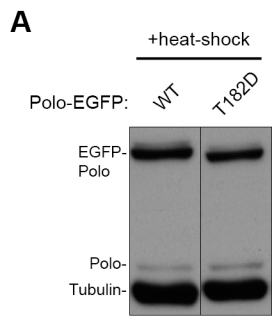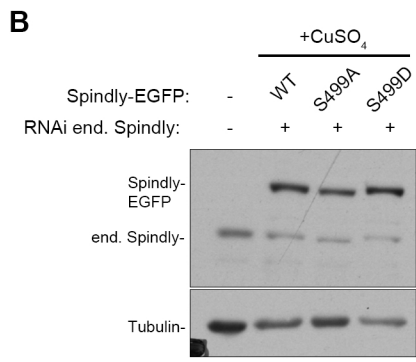

# APPENDIX FIGURE S3

**A**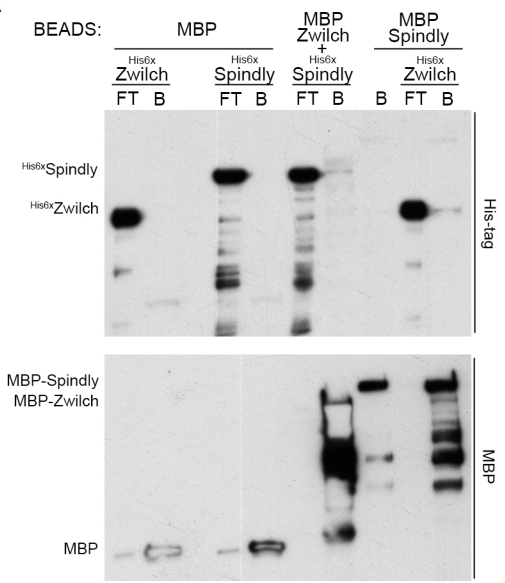

APPENDIX FIGURE S4

## APPENDIX FIGURE LEGENDS

### **Appendix Figure S1. Expression of Polo<sup>T182D</sup> destabilizes KT-MT interactions but fails to significantly increase Aurora B activity.**

**(A)** Representative immunofluorescence images of Mad1 localization at KTs of prometaphase *Drosophila* neuroblasts expressing either UAS-Polo<sup>WT</sup> (used as control) or UAS-Polo<sup>T182D</sup>. Insets show magnifications of the outlined regions which highlight increase number of KTs positive for Mad1. Spc105 was used as a KT reference.

**(B)** Graph represents the levels of Mad1 at KTs from prometaphase neuroblasts shown in (A). Mad1 signal was determined relative to Spc105 and all values were normalized to the control mean fluorescence intensity, which was set to 100% (n≥363 KTs from at least 30 neuroblasts for each condition, n=5 independent experiments).

**(C)** Representative immunofluorescence images of Spc105 phospho(ph)-S35 levels in unaligned KTs in neuroblasts expressing either UAS-Polo<sup>WT</sup> (used as control) or UAS-Polo<sup>T182D</sup>. Insets show magnifications of the outlined regions which highlight late congressing KTs.

**(D)** Graph represents the levels of Spc105phS35 at late congressing KTs for neuroblasts shown in (C). phS35 signal was determined relative to Spc105 and all values were normalized to the control mean fluorescence intensity, which was set to 100% (n≥61 KTs from at least 16 neuroblasts for each condition, n=4 independent experiments).

Data information: Statistical analysis was calculated using an unpaired t-test (Mann-Whitney). p values: ns, not significant; \*, <0.05. Data are shown as mean ± SD. Scale bar: 5 μm.

### **Appendix Figure S2. RZZ streaming along MTs depends on recruitment of Dynein to KTs and is reduced upon expression of Polo<sup>T182D</sup>.**

**(A)** Selected stills from live imaging analysis of Rod-GFP streaming in neuroblasts expressing Polo<sup>WT</sup>, Polo<sup>T182D</sup>, or depleted of Dynactin subunit p50 (UASp50<sup>RNAi</sup>) or Dynein heavy chain (UASDhc<sup>RNAi</sup>). *a* and *b* regions of interest were used to determine the levels for Rod-GFP and Tubulin-RFP in each condition. Scale bar: 5 μm.

**(B)** Graph represents the mean fluorescence intensity (MFI) for Rod-GFP in the spindle regions identified as *a* and *b*. All values were normalized to Tubulin-RFP MFI to account for short variations in the focal plane (n≥3 neuroblasts for each condition; data for UASDhc<sup>RNAi</sup> condition is from a single experiment). Data are shown as mean ± SD.

**Appendix Figure S3. EGFP-tagged transgene expression levels in Drosophila S2 cells.**

**(A)** Western blot analysis of EGFP-tagged Polo levels in Drosophila S2 cells shown in Fig.6A. Expression of EGFP-tagged Polo transgenes was induced using a heat-shock promoter. Tubulin was used as loading control.

**(B)** Western blot analysis of depletion efficiency for endogenous Spindly and of expression levels for RNAi-resistant Spindly<sup>WT</sup>-EGFP, Spindly<sup>S499A</sup>-EGFP and Spindly<sup>S499D</sup>-EGFP transgenes. Drosophila S2 cells were exposed to CuSO<sub>4</sub> for induction of transgene expression. Tubulin was used as a loading control.

**Appendix Figure S4. Spindly interacts with Zwilch *in vitro*.**

**(A)** Western blot analysis of MBP-Zwilch or MBP-Spindly<sup>WT</sup> pull down of his<sub>6x</sub>-Spindly<sup>WT</sup> or his<sub>6x</sub>-Zwilch, respectively. Immobilized MBP was used as negative control. B:Beads, FT: Flow-through.

**Appendix Table S1. List of the UAS-RNAi stocks used in the RNAi screen for Polo interactors**

| Gene         | CG number | #stock (V-VDRC) |        |         |
|--------------|-----------|-----------------|--------|---------|
| Sas-4        | CG10061   | V106051         |        |         |
| CG10104      | CG10104   | V108431         |        |         |
| Nup98-96     | CG10198   | V109279         |        |         |
| SMC2         | CG10212   | V10711          | V10713 | V103406 |
| nau          | CG10250   | V51311          |        |         |
| Rpt5         | CG10370   | V105133         |        |         |
| amos         | CG10393   | V100511         |        |         |
| RpS27        | CG10423   | V107108         |        |         |
| ko           | CG10573   | V31267          |        |         |
| Nak          | CG10637   | V109507         |        |         |
| vih          | CG10682   | V107720         |        |         |
| barr         | CG10726   | V26760          | V26759 |         |
| dm           | CG10798   | V106066         |        |         |
| ida          | CG10850   | V108634         |        |         |
| lok          | CG10895   | V44981          |        |         |
| Klp67A       | CG10923   | V108852         |        |         |
| Prosalpha5   | CG10938   | V108380         |        |         |
| l(1)dd4      | CG10988   | V104667         |        |         |
| rdgB         | CG11111   | V6226           |        |         |
| Sirt7        | CG11305   | V18043          |        |         |
| nAcRbeta-64B | CG11348   | V106570         |        |         |
| glu          | CG11397   | V10937          |        |         |
| fs(1)N       | CG11411   | V105859         |        |         |
| APC10        | CG11419   | V107331         |        |         |
| BtbVII       | CG11494   | V106063         |        |         |
| CG11596      | CG11596   | V108633         |        |         |
| Ubi-p63E     | CG11624   | V102379         |        |         |
| Nup358       | CG11856   | V38583          |        |         |
| Nup37        | CG11875   | V109814         |        |         |
| Rpn2         | CG11888   | V106457         |        |         |



|           |         |         |        |
|-----------|---------|---------|--------|
| Prosbeta3 | CG11981 | V100561 |        |
| Prosbeta7 | CG12000 | V101990 |        |
| Det       | CG12265 | V105741 |        |
| pdm2      | CG12287 | V102126 |        |
| polo      | CG12306 | V20177  |        |
| Prosbeta5 | CG12323 | V107628 |        |
| Hsp83     | CG1242  | V108568 |        |
| pav       | CG1258  | V46137  |        |
| CG13330   | CG13330 | V18790  |        |
| CG13380   | CG13380 | V106112 |        |
| Rpt1      | CG1341  | V108834 |        |
| CG13623   | CG13623 | V17334  |        |
| SA-2      | CG13916 | V108267 |        |
| stg       | CG1395  | V17760  |        |
| Bsg25D    | CG14025 | V102527 |        |
| Bub1      | CG14030 | V101096 |        |
| CG14164   | CG14164 | V48827  |        |
| CG14215   | CG14215 | V103547 |        |
| Tao       | CG14217 | V107645 |        |
| CG14427   | CG14427 | V101827 |        |
| CG14442   | CG14442 | V107485 |        |
| APC7      | CG14444 | V17622  |        |
| Klp10A    | CG1453  | V41534  |        |
| Cp110     | CG14617 | V101161 |        |
| Cap-H2    | CG14685 | V24905  |        |
| Rpt6      | CG1489  | V100620 |        |
| Prosalph7 | CG1519  | V102016 |        |
| CG1523    | CG1523  | V25199  |        |
| cathD     | CG1548  | V109651 |        |
| Kmn1      | CG1558  | V106889 | V19530 |
| mys       | CG1560  | V103704 |        |
| rod       | CG1569  | V19152  |        |
| CG15735   | CG15735 | V101762 |        |
| Pka-R2    | CG15862 | V101763 |        |

|              |         |         |        |        |
|--------------|---------|---------|--------|--------|
| dila         | CG1625  | V103788 |        |        |
| fzr2         | CG16783 | V32724  |        |        |
| Rpt3         | CG16916 | V100681 |        |        |
| skpA         | CG16983 | V107815 |        |        |
| CG17032      | CG17032 | V100337 |        |        |
| dod          | CG17051 | V25210  |        |        |
| Cep135       | CG17081 | V14195  |        |        |
| CG17134      | CG17134 | V100541 |        |        |
| Nek2         | CG17256 | V103408 |        |        |
| Prosalpha4T1 | CG17268 | V101203 |        |        |
| Pp2A-29B     | CG17291 | V49672  |        |        |
| Prosbeta4    | CG17331 | V19081  |        |        |
| Lk6          | CG17342 | V109663 |        |        |
| CG17493      | CG17493 | V40081  |        |        |
| mad2         | CG17498 | V106003 |        |        |
| gammaTub37C  | CG17566 | V109921 |        |        |
| Taf1         | CG17603 | V106119 |        |        |
| sw           | CG18000 | V101559 |        |        |
| Mis12        | CG18156 | V105052 | V19098 | V19097 |
| spen         | CG18497 | V108828 |        |        |
| mtrm         | CG18543 | V107579 |        |        |
| lin19        | CG1877  | V108558 |        |        |
| CAP-D2       | CG1911  | V33424  | V33423 |        |
| Acf1         | CG1966  | V33447  |        |        |
| dco          | CG2048  | V9241   |        |        |
| Mad1         | CG2072  | V43714  |        |        |
| Dfd          | CG2189  | V50110  |        |        |
| Rpt6R        | CG2241  | V105002 |        |        |
| Jra          | CG2275  | V107997 |        |        |
| TER94        | CG2331  | V24354  |        |        |
| Cdc23        | CG2508  | V107306 |        |        |
| Fs(2)Ket     | CG2637  | V107622 |        |        |
| rap          | CG3000  | V25553  |        |        |
| mus81        | CG3026  | V33688  |        |        |

|               |         |         |        |
|---------------|---------|---------|--------|
| CG30382       | CG30382 | V21156  |        |
| SNF1A         | CG3051  | V106200 |        |
| mr            | CG3060  | V106986 |        |
| aur           | CG3068  | V108446 |        |
| 14-3-3epsilon | CG31196 | V108129 |        |
| CG31291       | CG31291 | V21308  |        |
| dpr17         | CG31361 | V100978 |        |
| Rbp9          | CG3151  | V101412 |        |
| gammaTub23C   | CG3157  | V107572 |        |
| CG31687       | CG31687 | V21393  |        |
| Cap-D3        | CG31989 | V29657  |        |
| CG32371       | CG32371 | V106233 |        |
| Myt1          | CG32417 | V105157 |        |
| chb           | CG32435 | V108620 |        |
| Smc5          | CG32438 | V38969  | V38970 |
| disco-r       | CG32577 | V101579 |        |
| Eb1           | CG3265  | V24451  |        |
| l(1)G0148     | CG32742 | V104902 |        |
| Sdic3         | CG32823 | V50764  |        |
| Nsf2          | CG33101 | V7743   |        |
| CG33277       | CG33277 | V108072 |        |
| Prosbeta2     | CG3329  | V103575 |        |
| p53           | CG33336 | V103001 |        |
| CG3342        | CG3342  | V40325  |        |
| CG3348        | CG3348  | V8690   |        |
| zormin        | CG33484 | V101304 |        |
| cana          | CG33694 | V49776  |        |
| cp309         | CG33957 | V101645 |        |
| slmb          | CG3412  | V107825 |        |
| Prosalpha4    | CG3422  | V105712 |        |
| SA            | CG3423  | V106046 |        |
| Rpt4          | CG3455  | V52663  |        |
| CycB          | CG3510  | V109611 |        |
| bi            | CG3578  | V100598 |        |

|             |         |         |       |
|-------------|---------|---------|-------|
| mei-9       | CG3697  | V12670  |       |
| Grip84      | CG3917  | V105640 |       |
| Cep97       | CG3980  | V34774  |       |
| Prosbeta6   | CG4097  | V105673 |       |
| Mcm3        | CG4206  | V108214 |       |
| elav        | CG4262  | V37915  |       |
| CG42730     | CG42730 | V40858  |       |
| Pka-C1      | CG4379  | V101524 |       |
| fne         | CG4396  | V101508 |       |
| wee         | CG4488  | V106329 |       |
| smt3        | CG4494  | V105980 |       |
| Nup160      | CG4738  | V109318 |       |
| Tctp        | CG4800  | V45532  |       |
| cnm         | CG4832  | V110415 |       |
| RecQ5       | CG4879  | V13363  |       |
| CG4893      | CG4893  | V22358  |       |
| Prosalpha6  | CG4904  | V100703 |       |
| twe         | CG4965  | V104147 |       |
| msps        | CG5000  | V21982  |       |
| CG5004      | CG5004  | V26683  |       |
| CLIP-190    | CG5020  | V107176 |       |
| Doc1        | CG5133  | V104927 |       |
| Prosalpha2  | CG5266  | V29686  |       |
| CG5335      | CG5335  | V101295 |       |
| cdc2        | CG5363  | V106130 |       |
| Ote         | CG5581  | V105308 |       |
| CYLD        | CG5603  | V101414 |       |
| Prosalpha6T | CG5648  | V35023  |       |
| Nup75       | CG5733  | V27495  |       |
| CG5790      | CG5790  | V45044  |       |
| CycB3       | CG5814  | V108009 |       |
| SMC1        | CG6057  | V108922 | V6532 |
| Tsc1        | CG6147  | V22252  |       |
| Grip75      | CG6176  | V106044 |       |

|                 |        |         |
|-----------------|--------|---------|
| Bruce           | CG6303 | V107620 |
| DNApol-alpha180 | CG6349 | V103699 |
| emet            | CG6392 | V35081  |
| CG6498          | CG6498 | V109282 |
| Pp1alpha-96A    | CG6593 | V105525 |
| BicD            | CG6605 | V108084 |
| UbcD2           | CG6720 | V31158  |
| Nup107          | CG6743 | V22407  |
| Cdc16           | CG6759 | V103583 |
| Sec13           | CG6773 | V50367  |
| asp             | CG6875 | V2911   |
| bora            | CG6897 | V35134  |
| gig             | CG6975 | V103417 |
| cdc14           | CG7134 | V103627 |
| SAK             | CG7186 | V105102 |
| Rpt4R           | CG7257 | V107551 |
| eff             | CG7425 | V105731 |
| Mcm2            | CG7538 | V103619 |
| Bub3            | CG7581 | V21037  |
| tap             | CG7659 | V46806  |
| Nup43           | CG7671 | V108595 |
| gwl             | CG7719 | V21046  |
| Rpn1            | CG7762 | V103939 |
| pic             | CG7769 | V108924 |
| RpS8            | CG7808 | V106835 |
| BubR1           | CG7838 | V26109  |
| CG7911          | CG7911 | V102920 |
| Nlp             | CG7917 | V22625  |
| nudE            | CG8104 | V100713 |
| pbl             | CG8114 | V109305 |
| Dmn             | CG8269 | V23728  |
| dmt             | CG8374 | V100550 |
| Lis-1           | CG8440 | V106777 |
| clu             | CG8443 | V100709 |

|             |        |         |        |        |
|-------------|--------|---------|--------|--------|
| Kap-alpha1  | CG8548 | V108741 |        |        |
| Cdc27       | CG8610 | V35986  |        |        |
| Nup44A      | CG8722 | V106489 |        |        |
| CG9135      | CG9135 | V105403 |        |        |
| Pp1-13C     | CG9156 | V107770 |        |        |
| CG9170      | CG9170 | V108727 |        |        |
| shtd        | CG9198 | V29072  |        |        |
| Grip128     | CG9201 | V29074  |        |        |
| G1          | CG9206 | V3785   |        |        |
| Prosalph3   | CG9327 | V104373 |        |        |
| betaTub85D  | CG9359 | V109590 |        |        |
| alphaTub85E | CG9476 | V103202 |        |        |
| Sdic1       | CG9580 | V50546  |        |        |
| if          | CG9623 | V100770 |        |        |
| nudC        | CG9710 | V104008 |        |        |
| CG9727      | CG9727 | V106182 |        |        |
| Cap         | CG9802 | V101501 | V39205 | V39207 |
| CG9853      | CG9853 | V107346 |        |        |
| Prosbeta5R1 | CG9868 | V106943 |        |        |
| mit(1)15    | CG9900 | V108844 |        |        |
| Ndc80       | CG9938 | V29337  |        |        |
| RanGAP      | CG9999 | V108264 |        |        |

**Appendix Table S2. DroID-derived list of 222 genes predicted to be Polo interactors grouped according to broader Gene Ontology (GO) terms for biological processes**

| <b>GO Term</b> | <b>Biological process</b>                                | <b>GO Term usage in gene list (%)</b> |
|----------------|----------------------------------------------------------|---------------------------------------|
| GO:0007049     | cell cycle                                               | 46.76                                 |
| GO:0048856     | anatomical structure development                         | 43.06                                 |
| GO:0030154     | cell differentiation                                     | 38.43                                 |
| GO:0000278     | mitotic cell cycle                                       | 35.65                                 |
| GO:0000003     | reproduction                                             | 34.26                                 |
| GO:0022607     | cellular component assembly                              | 29.17                                 |
| GO:0051276     | chromosome organization                                  | 25.46                                 |
| GO:0007010     | cytoskeleton organization                                | 25.00                                 |
| GO:0006950     | response to stress                                       | 24.07                                 |
| GO:0034641     | cellular nitrogen compound metabolic process             | 22.22                                 |
| GO:0009056     | catabolic process                                        | 21.76                                 |
| GO:0140014     | mitotic nuclear division                                 | 21.30                                 |
| GO:0006464     | cellular protein modification process                    | 20.83                                 |
| GO:0007059     | chromosome segregation                                   | 19.91                                 |
| GO:0007165     | signal transduction                                      | 18.98                                 |
| GO:0006810     | transport                                                | 18.52                                 |
| GO:0009058     | biosynthetic process                                     | 18.06                                 |
| GO:0009790     | embryo development                                       | 13.89                                 |
| GO:0048646     | anatomical structure formation involved in morphogenesis | 13.89                                 |
| GO:0065003     | macromolecular complex assembly                          | 12.50                                 |
| GO:0051301     | cell division                                            | 12.50                                 |
| GO:0000902     | cell morphogenesis                                       | 11.11                                 |
| GO:0040011     | locomotion                                               | 9.72                                  |
| GO:0006461     | protein complex assembly                                 | 9.26                                  |
| GO:0016192     | vesicle-mediated transport                               | 8.80                                  |
| GO:0007267     | cell-cell signaling                                      | 8.80                                  |
| GO:0006259     | DNA metabolic process                                    | 8.33                                  |
| GO:0008283     | cell proliferation                                       | 8.33                                  |
| GO:0021700     | developmental maturation                                 | 7.87                                  |
| GO:0040007     | growth                                                   | 7.41                                  |
| GO:0048870     | cell motility                                            | 6.94                                  |
| GO:0008219     | cell death                                               | 6.94                                  |
| GO:0042592     | homeostatic process                                      | 5.56                                  |
| GO:0006913     | nucleocytoplasmic transport                              | 5.56                                  |
| GO:0050877     | nervous system processes                                 | 5.09                                  |

|               |                                                |      |
|---------------|------------------------------------------------|------|
| GO:0002376    | immune system process                          | 5.09 |
| GO:0044281    | small molecule metabolic process               | 4.17 |
| GO:0006914    | autophagy                                      | 3.70 |
| GO:0030705    | cytoskeleton-dependent intracellular transport | 3.70 |
| GO:0005975    | carbohydrate metabolic process                 | 3.24 |
| GO:0007568    | aging                                          | 2.78 |
| GO:0061024    | membrane organization                          | 2.78 |
| GO:0006397    | mRNA processing                                | 1.85 |
| GO:0007155    | cell adhesion                                  | 1.39 |
| GO:0006412    | translation                                    | 1.39 |
| GO:0006457    | protein folding                                | 0.93 |
| GO:0006091    | generation of precursor metabolites and energy | 0.93 |
| GO:0006629    | lipid metabolic process                        | 0.93 |
| GO:0044403    | symbiont process                               | 0.93 |
| GO:0051604    | protein maturation                             | 0.93 |
| GO:0030198    | extracellular matrix organization              | 0.46 |
| GO:0032196    | transposition                                  | 0.46 |
| GO:0019748    | secondary metabolic process                    | 0.46 |
| GO:0006790    | sulfur compound metabolic process              | 0.46 |
| GO:0042254    | ribosome biogenesis                            | 0.46 |
| GO:0051186    | cofactor metabolic process                     | 0.46 |
| GO:0034330    | cell junction organization                     | 0.46 |
| GO:0043473    | pigmentation                                   | 0.46 |
| GO:0003013    | circulatory system process                     | 0.46 |
| non-annotated | -                                              | 1.81 |



## **APPENDIX TABLE LEGENDS**

**Appendix Table S1. List of the UAS-RNAi stocks used in the RNAi screen for Polo interactors.** UAS-RNAi lines ordered for the 222 candidate genes identified in DroID database ([www.droidb.org](http://www.droidb.org)) as putative Polo interactors. RNAi lines are highlighted in red when expression alone results in adult lethality. RNAi lines highlighted in yellow were not tested.

**Appendix Table S2. DroID-derived list of 222 genes predicted to be Polo interactors grouped according to broader Gene Ontology (GO) terms for biological processes.** List of GO terms for biological processes for the 222 candidate genes identified in DroID database ([www.droidb.org](http://www.droidb.org)) as putative Polo interactors. GO terms were ranked according to GO Term Mapper resource from [go.princeton.edu](http://go.princeton.edu).
